# Supplementary material for: Sexting, Web-Based Risks, and Safety in Two Representative National Samples of Young Australians: Prevalence, Perspectives, and Predictors
Source: PubMed Central journal article supplement (PMC6601255; doi:10.2196/13338), 2019-06-17
Supplement: mental_v6i6e13338_app1.pdf [file mental_v6i6e13338_app1.pdf]

## Multimedia Appendices

### Multimedia Appendix 1.

#### Socio-demographic and wellbeing changes from 2012 to 2014

| Item                           |                                  | 2012 | 2014 | $\chi^2$ | <i>P</i> |
|--------------------------------|----------------------------------|------|------|----------|----------|
| <i>Socio-demographic Items</i> |                                  |      |      |          |          |
| Gender                         | N                                | 1400 | 1400 | 0.04     | 0.85     |
|                                | <i>Male</i>                      | %    | 50.0 | 50.4     |          |
|                                | <i>Female</i>                    | %    | 50.0 | 49.6     |          |
| Age                            | N                                | 1400 | 1400 | 0.42     | 0.81     |
|                                | <i>16-18</i>                     | %    | 34.6 | 35.6     |          |
|                                | <i>19-21</i>                     | %    | 33.3 | 33.1     |          |
|                                | <i>22-25</i>                     | %    | 32.1 | 31.2     |          |
| Language                       | N                                | 1400 | 1400 | 0.93     | 0.34     |
|                                | <i>English only</i>              | %    | 77.6 | 79.1     |          |
|                                | <i>Additional language</i>       | %    | 22.4 | 20.9     |          |
| Location                       | N                                | 1400 | 1400 | 0.002    | 0.97     |
|                                | <i>Major city</i>                | %    | 74.8 | 74.9     |          |
|                                | <i>Regional, rural or remote</i> | %    | 25.2 | 25.1     |          |
| Living with parents            | N                                | 1400 | 1400 | 1.27     | 0.26     |
|                                | <i>Yes</i>                       | %    | 73.6 | 75.5     |          |
|                                | <i>No</i>                        | %    | 26.4 | 24.5     |          |
| Main activity: Education       | N                                | 1399 | 1398 | 0.04     | 0.84     |

|                                                          |                          |   |      |      |      |       |
|----------------------------------------------------------|--------------------------|---|------|------|------|-------|
|                                                          | <i>Yes</i>               | % | 58.2 | 57.8 |      |       |
|                                                          | <i>No</i>                | % | 41.8 | 42.2 |      |       |
| Main activity: Employment                                |                          | N | 1399 | 1398 | 0.55 | 0.46  |
|                                                          | <i>Yes</i>               | % | 35.2 | 33.9 |      |       |
|                                                          | <i>No</i>                | % | 64.8 | 66.1 |      |       |
| Aboriginal and/or Torres Strait Islander                 |                          | N | 1399 | 1396 | 4.31 | .04   |
|                                                          | <i>Yes</i>               | % | 2.1  | 3.4  |      |       |
|                                                          | <i>No</i>                | % | 97.8 | 96.6 |      |       |
| <i>Mental Health and Wellbeing Items</i>                 |                          |   |      |      |      |       |
| Psychological distress                                   |                          | N | 1400 | 1373 | 0.67 | 0.01  |
|                                                          | <i>Low to moderate</i>   | % | 79.1 | 74.9 |      |       |
|                                                          | <i>High to very high</i> | % | 20.9 | 25.1 |      |       |
| Suicidal thoughts and behaviours                         |                          | N |      |      | .36  | .55   |
|                                                          | <i>Yes</i>               | % | 18.3 | 17.4 |      |       |
|                                                          | <i>No</i>                | % | 81.7 | 82.6 |      |       |
| Personal concern: Mental health or behavioural diagnosis |                          | N | 1389 | 1394 | 2.35 | 0.13  |
|                                                          | <i>Yes</i>               | % | 21.5 | 23.9 |      |       |
|                                                          | <i>No</i>                | % | 78.5 | 76.1 |      |       |
| Personal concern: Alcohol or substance use diagnosis     |                          | N | 1397 | 1400 | 7.25 | 0.007 |
|                                                          | <i>Yes</i>               | % | 97.5 | 98.9 |      |       |
|                                                          | <i>No</i>                | % | 2.5  | 1.1  |      |       |

|                                               |        |              |              |                   |         |
|-----------------------------------------------|--------|--------------|--------------|-------------------|---------|
| Personal concern: Coping with stress          | N      | 1390         | 1396         | 12.39             | <.0001  |
| Yes                                           | %      | 58.5         | 65.0         |                   |         |
| No                                            | %      | 41.5         | 35.0         |                   |         |
| Personal concern: Body image                  | N      | 1394         | 1393         | 20.49             | <.0001  |
| Yes                                           | %      | 39.2         | 47.7         |                   |         |
| No                                            | %      | 60.8         | 52.3         |                   |         |
| Personal concern: Depression                  | N      | 1393         | 1388         | 8.11              | 0.004   |
| Yes                                           | %      | 30.6         | 35.7         |                   |         |
| No                                            | %      | 69.4         | 64.3         |                   |         |
| Personal concern: Bullying or emotional abuse | N      | 1397         | 1394         | 25.20             | <0.0001 |
| Yes                                           | %      | 79.2         | 70.9         |                   |         |
| No                                            | %      | 20.8         | 29.1         |                   |         |
| Personal concern: Alcohol                     | N      | 1394         | 1394         | 37.01             | <0.0001 |
| Yes                                           | %      | 10.7         | 18.9         |                   |         |
| No                                            | %      | 89.3         | 81.1         |                   |         |
| Personal concern: Drugs                       | N      | 1397         | 1399         | 42.46             | <0.0001 |
| Yes                                           | %      | 8.2          | 16.2         |                   |         |
| No                                            | %      | 91.8         | 83.8         |                   |         |
| Personal concern: Self-harm                   | N      | 1394         | 1396         | 37.00             | <0.0001 |
| Yes                                           | %      | 8.1          | 15.5         |                   |         |
| No                                            | %      | 91.9         | 84.5         |                   |         |
| Social support                                | M (SD) | -            | 9.88 (2.55)  | -                 | -       |
| Resilience                                    | M (SD) | 16.02 (2.82) | 15.51 (2.62) | 4.90 <sup>a</sup> | 0.001   |

|                                         |        |             |             |                    |        |
|-----------------------------------------|--------|-------------|-------------|--------------------|--------|
| <i>Internet Use Items</i>               |        |             |             |                    |        |
| Use the Internet                        | N      | 1400        | 1399        | .36                | 0.55   |
| <i>Yes</i>                              | %      | 99.0        | 99.2        |                    |        |
| <i>No</i>                               | %      | 1.00        | 0.8         |                    |        |
| Internet access                         | N      | 1386        | 1388        | 19.41              | <.0001 |
| <i>Every day or almost every day</i>    | %      | 95.3        | 98.0        |                    |        |
| <i>Not every day / almost every day</i> | %      | 4.7         | 2.0         |                    |        |
| Internet use after 11pm at night        | N      | 1383        | 1387        | 3.41               | 0.07   |
| <i>Yes</i>                              | %      | 63.1        | 66.4        |                    |        |
| <i>No</i>                               | %      | 36.9        | 33.6        |                    |        |
| Time spent on the internet              | M (SD) | 3.42 (2.93) | 4.45 (3.14) | -8.93 <sup>a</sup> | <.0001 |

a. t statistic
