# Supplementary material for: Sexting, Web-Based Risks, and Safety in Two Representative National Samples of Young Australians: Prevalence, Perspectives, and Predictors
Source: PubMed Central journal article supplement (PMC6601255; doi:10.2196/13338), 2019-06-17
Supplement: mental_v6i6e13338_app2.pdf [file mental_v6i6e13338_app2.pdf]

## Multimedia Appendix 2.

Crude ORs and AORs of the association of demographic, health and wellbeing items, and internet use with sexting activity (2014 data)

| Variable                                                     | Sexting activity vs. all others <sup>b</sup> |                              |                              |                              |                              |                             |                              |                             |
|--------------------------------------------------------------|----------------------------------------------|------------------------------|------------------------------|------------------------------|------------------------------|-----------------------------|------------------------------|-----------------------------|
|                                                              | Two-way                                      |                              | Sender <sup>c</sup>          |                              | Receiver <sup>d</sup>        |                             | No-sexting                   |                             |
|                                                              | Crude OR<br>95% CI                           | AOR Exp(B)<br>95% CI         | Crude OR<br>95% CI           | AOR Exp(B)<br>95% CI         | Crude OR<br>95% CI           | AOR Exp(B)<br>95% CI        | Crude OR<br>95% CI           | AOR Exp(B)<br>95% CI        |
| <i>Demographics</i>                                          |                                              |                              |                              |                              |                              |                             |                              |                             |
| Gender (male vs female)                                      | <b>0.61**</b><br>[0.50-0.76]                 | <b>0.63*</b><br>[0.41-0.96]  | <b>0.61**</b><br>[0.49-0.76] | <b>0.58*</b><br>[0.38-0.89]  | 0.87<br>[0.69-1.11]          | <b>0.59*</b><br>[0.37-0.95] | 1.17<br>[0.92-1.49]          | <b>1.73*</b><br>[1.07-2.80] |
| Age (16-18yrs vs 19-21yrs)                                   | <b>1.65**</b><br>[1.27-2.14]                 | 1.13<br>[0.71-1.80]          | <b>1.64**</b><br>[1.27-2.13] | 1.11<br>[0.70-1.76]          | 1.19<br>[0.89-1.57]          | 0.83<br>[0.51-1.37]         | 0.78<br>[0.58-1.05]          | 1.22<br>[0.73-2.04]         |
| Age (16-18yrs vs 22-25yrs)                                   | <b>2.07**</b><br>[1.59-2.70]                 | 1.34<br>[0.78-2.30]          | <b>2.11**</b><br>[1.62-2.75] | 1.23<br>[0.72-2.10]          | 1.23<br>[0.92-1.64]          | 0.72<br>[0.41-1.27]         | 0.84<br>[0.63-1.11]          | 1.56<br>[0.87-2.79]         |
| English only language spoken (No vs Yes)                     | 1.23<br>[0.95-1.61]                          | <b>1.66*</b><br>[1.01-2.73]  | 1.21<br>[0.93-1.58]          | <b>1.71*</b><br>[1.04-2.80]  | <b>1.32*</b><br>[1.00-1.76]  | 1.53<br>[0.93-2.55]         | 0.76<br>[0.57-1.01]          | 0.62<br>[0.37-1.03]         |
| Indigenous (No vs Yes)                                       | 0.98<br>[0.55-1.75]                          | 0.74<br>[0.23-2.37]          | 1.09<br>[0.62-1.96]          | 0.93<br>[0.30-2.94]          | 1.24<br>[0.63-2.47]          | 0.93<br>[0.23-3.80]         | 0.67<br>[0.32-1.39]          | 0.70<br>[0.14-3.65]         |
| Location (major city vs regional, rural or remote)           | 0.93<br>[0.73-1.19]                          | 1.01<br>[0.66-1.56]          | 0.96<br>[0.75-1.23]          | 1.00<br>[0.65-1.54]          | 1.05<br>[0.80-1.38]          | 0.97<br>[0.59-1.59]         | 0.91<br>[0.68-1.21]          | 1.05<br>[0.63-1.74]         |
| Currently in education (No vs Yes)                           | <b>0.51**</b><br>[0.41-0.63]                 | 0.72<br>[0.36-1.42]          | <b>0.51**</b><br>[0.41-0.63] | 0.80<br>[0.41-1.59]          | <b>0.67*</b><br>[0.52-0.85]  | 0.66<br>[0.29-1.50]         | <b>1.55*</b><br>[1.21-1.99]  | 1.32<br>[0.58-3.02]         |
| Currently in employment (No vs Yes)                          | <b>1.97**</b><br>[1.57-2.47]                 | 1.36<br>[0.68-2.74]          | <b>2.03**</b><br>[1.62-2.54] | 1.57<br>[0.78-3.16]          | <b>1.66**</b><br>[1.27-2.16] | 1.05<br>[0.45-2.45]         | <b>0.57**</b><br>[0.43-0.74] | 0.76<br>[0.32-1.81]         |
| Live with parent(s) or guardian(s) (No vs Yes)               | <b>0.64**</b><br>[0.50-0.82]                 | 0.88<br>[0.54-1.44]          | <b>0.60**</b><br>[0.47-0.76] | 0.79<br>[0.48-1.28]          | <b>0.64*</b><br>[0.48-0.86]  | <b>0.53*</b><br>[0.29-0.93] | <b>1.79**</b><br>[1.32-2.43] | <b>2.36*</b><br>[1.28-4.36] |
| Currently in a relationship (No vs Yes)                      | <b>2.43**</b><br>[1.78-3.32]                 | <b>2.16**</b><br>[1.47-3.19] | <b>2.32**</b><br>[1.70-3.16] | <b>2.11**</b><br>[1.43-3.09] | <b>1.57*</b><br>[1.10-2.25]  | 1.14<br>[0.73-1.76]         | <b>0.66*</b><br>[0.46-0.95]  | 0.90<br>[0.57-1.41]         |
| <i>Health and Wellbeing</i>                                  |                                              |                              |                              |                              |                              |                             |                              |                             |
| Psychological distress (K10: low/moderate vs high/very high) | 1.04<br>[0.82-1.34]                          | 0.68<br>[0.39-1.17]          | 1.06<br>[0.83-1.35]          | 0.67<br>[0.39-1.15]          | <b>1.86**</b><br>[1.37-2.52] | 1.36<br>[0.74-2.49]         | <b>0.51**</b><br>[0.37-0.70] | 0.72<br>[0.39-1.35]         |
| Suicidal ideation and or acts (PSFS)                         | <b>1.50*</b><br>[1.13-2.00]                  | <b>1.86*</b><br>[1.00-3.46]  | <b>1.62*</b><br>[1.22-2.16]  | <b>2.21*</b><br>[1.19-4.10]  | <b>1.92**</b><br>[1.34-2.76] | 1.10<br>[0.53-2.33]         | <b>0.43**</b><br>[0.30-0.65] | 0.63<br>[0.28-1.41]         |
| Mental health diagnosis (No vs Yes)                          | 1.20<br>[0.94-1.54]                          | 0.92<br>[0.57-1.51]          | 1.25<br>[0.97-1.60]          | 0.93<br>[0.57-1.52]          | <b>1.87**</b><br>[1.37-2.54] | 1.68<br>[0.96-2.96]         | <b>0.49**</b><br>[0.36-0.68] | 0.57<br>[0.32-1.02]         |

|                                                         |                              |                               |                              |                               |                              |                              |                              |                              |
|---------------------------------------------------------|------------------------------|-------------------------------|------------------------------|-------------------------------|------------------------------|------------------------------|------------------------------|------------------------------|
| Alcohol or other substance misuse diagnosis (No vs Yes) | <b>4.17*</b><br>[1.34-13.00] | 3.74<br>[0.38-36.96]          | <b>3.93*</b><br>[1.26-12.25] | 3.34<br>[0.33-33.52]          | 1.60<br>[0.45-5.64]          | 0.72<br>[0.07-7.76]          | 0.67<br>[0.19-2.38]          | 1.96<br>[0.17-21.99]         |
| Personal concern: Alcohol (No vs Yes)                   | <b>1.35*</b><br>[1.03-1.76]  | 1.04<br>[0.58-1.87]           | 1.28<br>[0.98-1.67]          | 1.00<br>[0.56-1.78]           | <b>1.73*</b><br>[1.24-2.41]  | 1.04<br>[0.51-2.11]          | <b>0.61*</b><br>[0.44-0.86]  | 1.02<br>[0.49-2.09]          |
| Personal concern: Body Image (No vs Yes)                | <b>1.60**</b><br>[1.29-1.98] | <b>2.06*</b><br>[1.33-3.19]   | <b>1.56**</b><br>[1.27-1.94] | <b>2.00*</b><br>[1.30-3.08]   | <b>1.92**</b><br>[1.51-2.46] | 1.44<br>[0.90-2.32]          | <b>0.52**</b><br>[0.41-0.67] | 0.70<br>[0.43-1.14]          |
| Personal concern: Bullying (No vs Yes)                  | <b>1.35*</b><br>[1.07-1.70]  | 1.37<br>[0.80-2.34]           | <b>1.28*</b><br>[1.01-1.61]  | 1.16<br>[0.68-1.97]           | <b>1.53*</b><br>[1.16-2.02]  | 0.85<br>[0.46-1.58]          | <b>0.69*</b><br>[0.52-0.92]  | 1.53<br>[0.81-2.89]          |
| Personal concern: Stress (No vs Yes)                    | 1.13<br>[0.90-1.41]          | 1.11<br>[0.71-1.73]           | 1.13<br>[0.90-1.41]          | 1.16<br>[0.74-1.81]           | <b>1.57**</b><br>[1.23-2.00] | 1.26<br>[0.78-2.04]          | <b>0.63**</b><br>[0.49-0.81] | 0.75<br>[0.46-1.22]          |
| Personal concern: Depression (No vs Yes)                | <b>1.40*</b><br>[1.12-1.74]  | 0.63<br>[0.35-1.12]           | <b>1.41*</b><br>[1.13-1.76]  | 0.68<br>[0.38-1.20]           | <b>1.60**</b><br>[1.24-2.07] | 0.62<br>[0.33-1.16]          | <b>0.63*</b><br>[0.46-0.79]  | 1.56<br>[0.81-2.99]          |
| Personal concern: Drugs (No vs Yes)                     | <b>1.86**</b><br>[1.40-2.48] | 1.85<br>[0.91-3.75]           | <b>1.81**</b><br>[1.36-2.41] | 2.00<br>[0.99-4.05]           | <b>2.17**</b><br>[1.49-3.16] | 2.39<br>[0.98-5.83]          | <b>0.47**</b><br>[0.32-0.68] | <b>0.35*</b><br>[0.14-0.90]  |
| Personal concern: Self-harm (No vs Yes)                 | <b>1.35*</b><br>[1.01-1.80]  | 0.63<br>[0.31-1.25]           | <b>1.34*</b><br>[1.00-1.79]  | 0.62<br>[0.31-1.24]           | <b>1.59*</b><br>[1.11-2.27]  | 0.72<br>[0.32-1.64]          | <b>0.62*</b><br>[0.43-0.89]  | 1.45<br>[0.61-3.43]          |
| Resilience (BRCS)                                       | -                            | 1.03<br>[0.96-1.12]           | -                            | 1.03<br>[0.95-1.11]           | -                            | 1.02<br>[0.94-1.11]          | -                            | 0.99<br>[0.90-1.08]          |
| Social support (SSSS)                                   | -                            | 0.96<br>[0.88-1.04]           | -                            | 0.96<br>[0.88-1.04]           | -                            | 1.03<br>[0.93-1.13]          | -                            | 0.97<br>[0.88-1.07]          |
| <i>Internet use and online and communication risks</i>  |                              |                               |                              |                               |                              |                              |                              |                              |
| Has been cyberbullied in the past 12 months (No vs Yes) | <b>2.02**</b><br>[1.52-2.69] | 1.11<br>[0.61-2.02]           | <b>1.97**</b><br>[1.48-2.63] | 1.07<br>[0.59-2.94]           | <b>3.33**</b><br>[2.17-5.10] | <b>4.61*</b><br>[1.85-11.50] | <b>0.29**</b><br>[0.19-0.46] | <b>0.22*</b><br>[0.09-0.56]  |
| Cyberbullied others in the past 12 months (No vs Yes)   | <b>3.25**</b><br>[2.11-5.01] | <b>5.28**</b><br>[2.20-12.65] | <b>3.21**</b><br>[2.08-4.97] | <b>4.79**</b><br>[2.00-11.44] | <b>2.65*</b><br>[1.46-4.80]  | 1.40<br>[0.41-4.83]          | <b>0.37*</b><br>[0.20-0.68]  | 0.87<br>[0.25-3.02]          |
| Average time spent on internet                          | -                            | 1.02<br>[0.96-1.09]           | -                            | 1.02<br>[0.96-1.09]           | -                            | 0.98<br>[0.92-1.05]          | -                            | 1.02<br>[0.95-1.09]          |
| Late night internet use (No vs Yes)                     | <b>2.01**</b><br>[1.59-2.54] | <b>1.92*</b><br>[1.24-2.95]   | <b>2.03**</b><br>[1.61-2.56] | <b>1.88*</b><br>[1.23-2.88]   | <b>2.12**</b><br>[1.66-2.71] | <b>2.58**</b><br>[1.67-3.98] | <b>0.45**</b><br>[0.35-0.58] | <b>0.38**</b><br>[0.24-0.59] |

- \*\* Correlation is significant at the 0.01 level (2-tailed); \* Correlation is significant at the 0.05 level (2-tailed).
- Cells left blank indicate scale items which do not have a crude OR calculation option.
- Includes all respondents who reported sending sexts in any form.
- Includes all respondents who reported receiving sexts in any form.
